# Supplementary material
Source: MDPI journal article supplement (https://www.mdpi.com/2227-9717/11/3/672)
Supplement: s1 [file s1]

## Supplementary Information

# Application of PLC-Based Spectrophotometric System Nitrogen Protection Device to Automated Direct Measurement of Target Substances in Zinc Hydrometallurgy

Xuefei Zhang <sup>1</sup>, Ning Duan <sup>1,2,3,\*</sup>, Linhua Jiang <sup>1,2,3,\*</sup>, Fuyuan Xu <sup>2,3</sup>, Zhaosheng Yu <sup>4</sup>,  
Wen Cheng <sup>2</sup>, Wenbao Lv <sup>1</sup> and Yibing Qiu <sup>1</sup>

<sup>1</sup> School of Materials Science and Engineering, Anhui University of Science and Technology,  
Huainan 232001, China

<sup>2</sup> State Key Laboratory of Pollution Control and Resources Reuse, College of Environmental Science and Engineering, Tongji University, Shanghai 200092, China

<sup>3</sup> Shanghai Institute of Pollution Control and Ecological Security, Shanghai 200092, China

<sup>4</sup> Tianjin Xinke Environmental Protection Technology Co., Ltd., Tianjin 300457, China

\* Correspondence: ningduan2020@163.com (N.D.); jianglinhuann@163.com (L.J.);  
Tel.: +86-138-010-149-10 (N.D.); +86-132-693-671-32 (L.J.)

**The supplementary materials include 9 pages.**

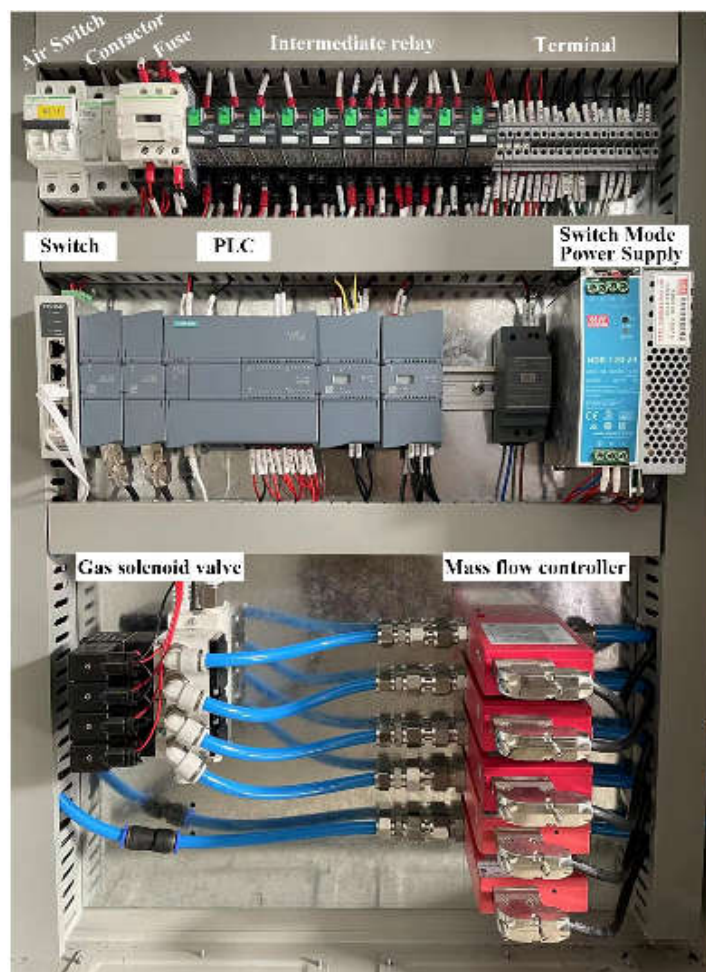

**Figure S1.** Internal physical picture of electric control cabinet.

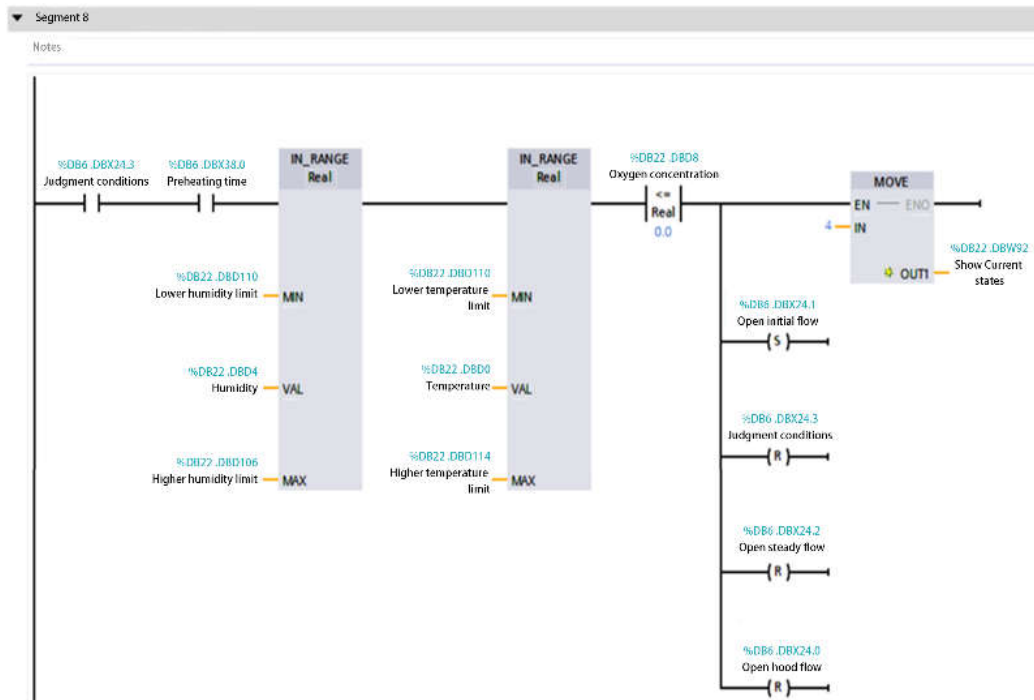

**Figure S2.** Current test environment detection procedure.

Monitor operation

Next

Current state: Preparing

Stop

0.0 s

Preheating remaining time

Auto

Start

Step

Waste

Recycle

Clear

Import

20 °C

11.6 %

0.0 %

L / min

6.00

2.00

3.00

0.00

11.00

Temperature

Humidity

Concentration

Light source area

Sample area

Receiving data area

Cover

Outlet

Monitor operation

Optical path

Set

Manual mode

Alarm

Close

**Figure S3.** Operation monitoring interface.

| Optical path         | Cleaning speed<br>/r/min | Injection speed<br>/r/min | Cleaning time<br>/s | Injection time<br>/s |       |
|----------------------|--------------------------|---------------------------|---------------------|----------------------|-------|
| 1                    | 50.0                     | 30.0                      | 20.0                | 30.0                 |       |
| 5                    | 50.0                     | 30.0                      | 23.0                | 32.0                 |       |
| 10                   | 50.0                     | 30.0                      | 25.0                | 33.0                 |       |
| 50                   | 50.0                     | 30.0                      | 29.0                | 36.0                 |       |
| 100                  | 50.0                     | 30.0                      | 33.0                | 40.0                 |       |
| 1+5                  | 50.0                     | 30.0                      | 28.0                | 35.0                 |       |
| 5+10                 | 50.0                     | 30.0                      | 32.0                | 38.0                 |       |
| 1+5+10               | 50.0                     | 30.0                      | 40.0                | 40.0                 | Next  |
| Monitor<br>operation | Optical<br>path          | Set                       | Manual<br>mode      | Alarm                | Close |

**Figure S4.** Optical path selection interface.

# Cleaning and flow setting

|                      |    |       | Stable flow         | Initial flow |           |
|----------------------|----|-------|---------------------|--------------|-----------|
| Preheating time      | 15 | min   | Optical system area | 0.6          | 6.0 L/min |
| Cleaning times       | 2  |       | Sample area         | 0.6          | 2.0 L/min |
| Total cleaning times | 20 | Clear | Data receiving area | 0.6          | 3.0 L/min |
|                      |    |       | Cover               | 30           | L/min     |

Monitor operation

Optical path

Set

Manual mode

Alarm

Close

Figure S5. Parameter setting interface.

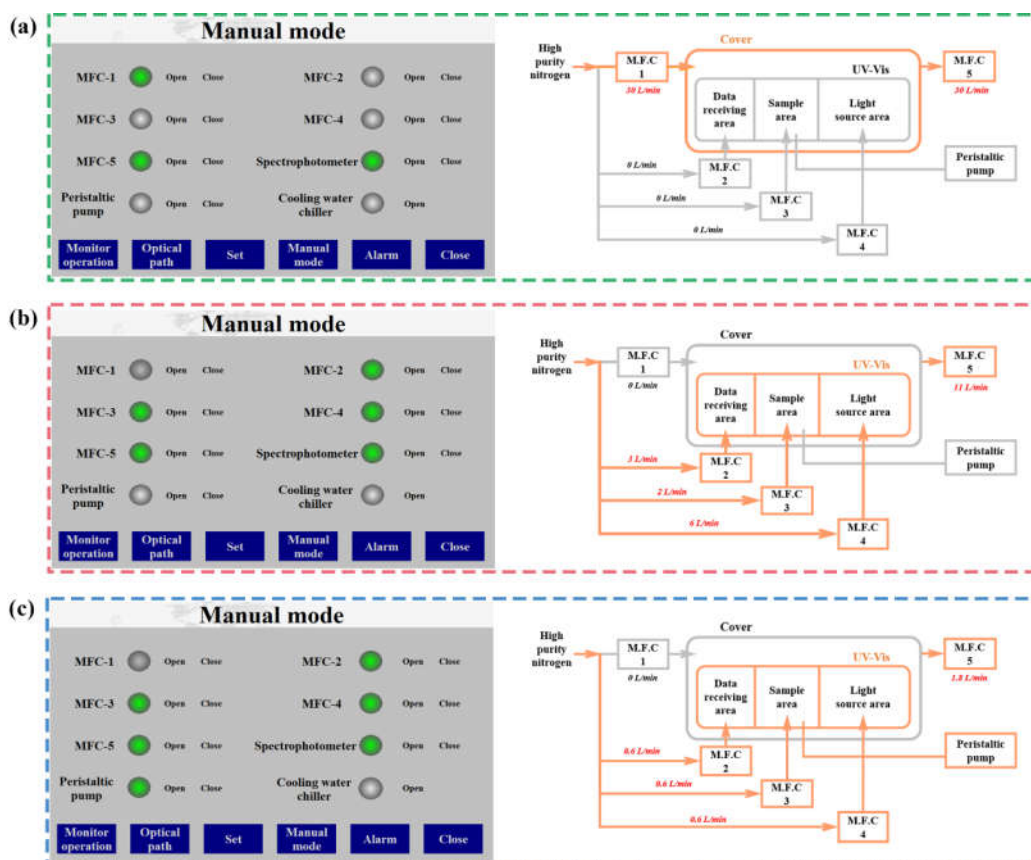

**Figure S6.** Manual control interface under different conditions, including: (a) nitrogen replaces the air inside the hood at a high flow rate of 30 L/min; (b) Nitrogen displaces the air inside the light source system area, sample room and data receiving area of the instrument at the optimal flow rate of 6, 2 and 3 L/min; (c) At the detection stage, the nitrogen flow is 0.6 L/min.

# Alarm window

Maximum temperature

30°C

Minimum temperature

10°C

Maximum humidity

30%

Minimum humidity

0%

Maximum concentration

20.9%

| Date | Time | Alarm description |
|------|------|-------------------|
|      |      |                   |
|      |      |                   |
|      |      |                   |
|      |      |                   |
|      |      |                   |
|      |      |                   |
|      |      |                   |
|      |      |                   |

Monitor operation

Optical path

Set

Manual mode

Alarm

Close

Figure S7. Alarm prompt interface.



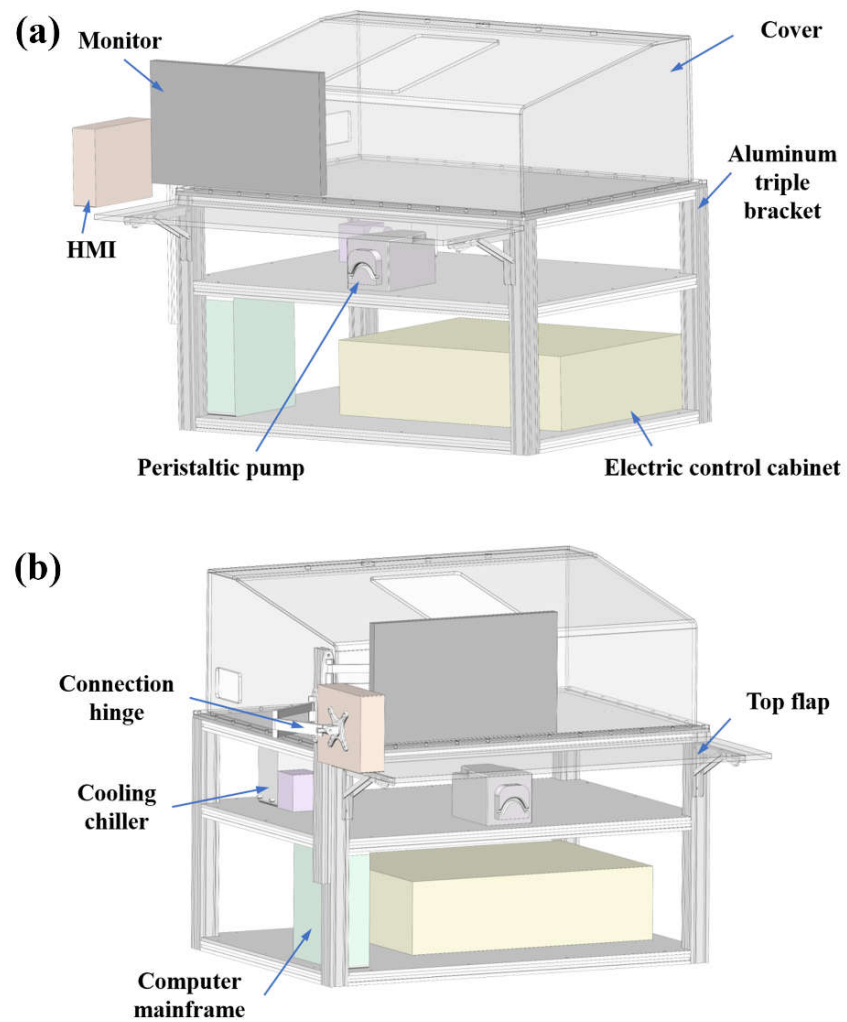

**Figure S8.** The system rendering of device.

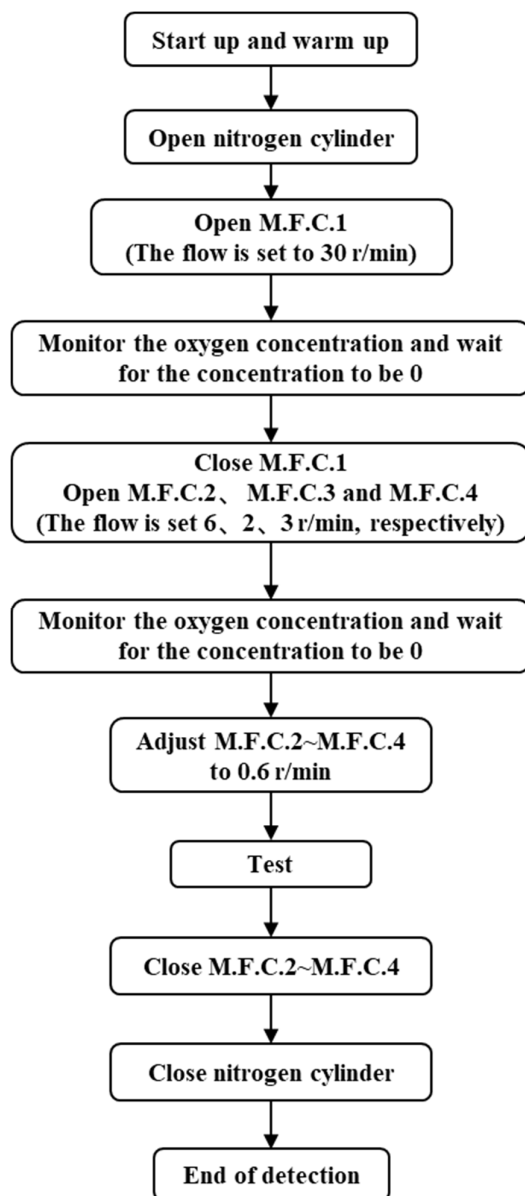

**Figure S9.** Upper computer program operation flow chart.
